# Supplementary material for: Construction and clinical application of a risk model based on N6-methyladenosine regulators for colorectal cancer
Source: PubMed Central journal article supplement (PMC11665428; doi:10.7717/peerj.18719), 2024-12-20

**A**

Chi-Squared Test

 $-\log_{10}(\text{pvalue}) = 3.44$ 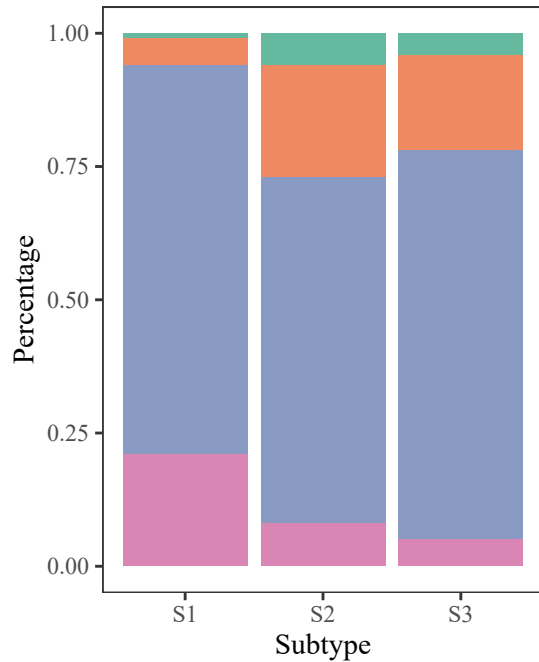

Chi-Squared Test

 $-\log_{10}(\text{pvalue}) = 2.64$ 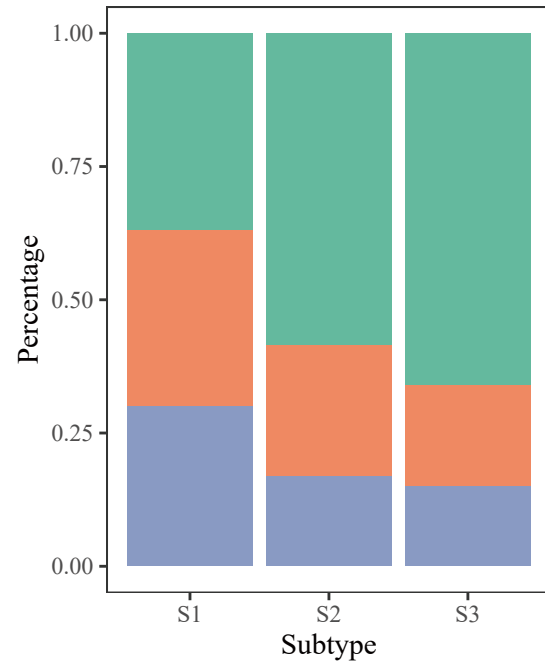

Chi-Squared Test

 $-\log_{10}(\text{pvalue}) = 0.98$ 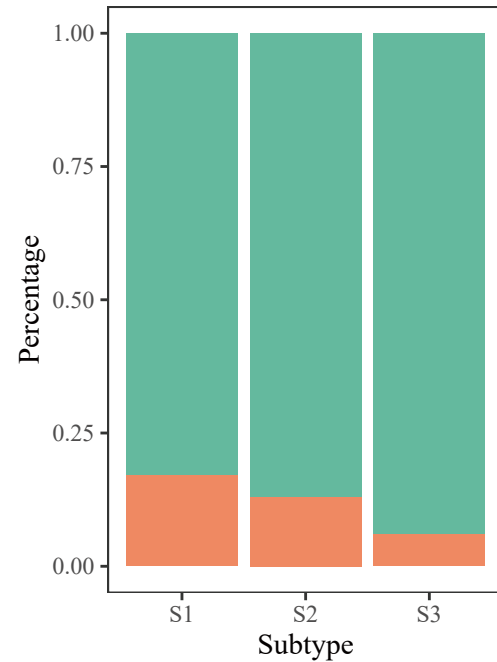

Chi-Squared Test

 $-\log_{10}(\text{pvalue}) = 3.57$ 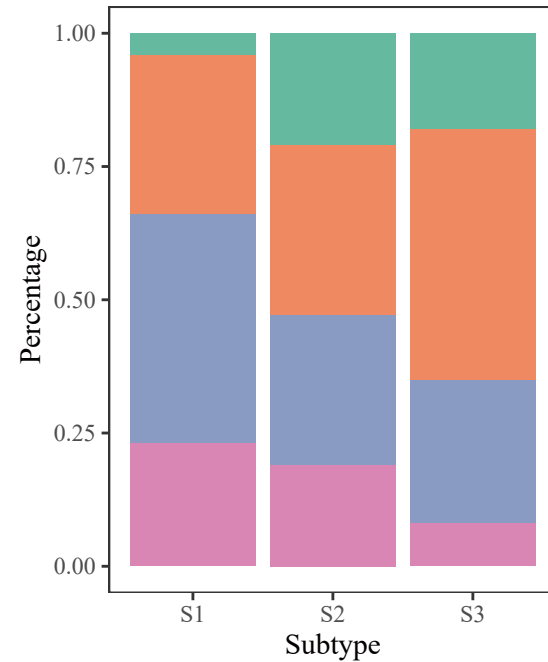

Supplement: peerj-12-18719-s001.pdf [file peerj-12-18719-s001.pdf]
